# Supplementary material for: Long term gluten consumption in adults without celiac disease and risk of coronary heart disease: prospective cohort study
Source: PubMed Central journal article supplement — BMJ. 2017 May 2;357:j1892. doi: 10.1136/bmj.j1892 (PMC5421459; doi:10.1136/bmj.j1892), 2017-05-02
Supplement: lebb037490.ww1.pdf [file lebb037490.ww1.pdf]

**Supplementary Table A: Correlation between the top 5 contributors to gluten on the baseline semi-quantitative food frequency questionnaire (1986) and 7-day dietary recall.**

| <b>Food</b>                                                                     | <b>NHS<sup>a</sup></b> | <b>HPFS<sup>b</sup></b> |
|---------------------------------------------------------------------------------|------------------------|-------------------------|
| <i>Dark Bread</i><br>Percentage of gluten•<br>Correlation with dietary recall*  | 15%<br>0.77            | 14%<br>0.37             |
| <i>Pasta</i><br>Percentage of gluten•<br>Correlation with dietary recall*       | 15%<br>0.35            | 13%<br>0.70             |
| <i>Cold cereal</i><br>Percentage of gluten•<br>Correlation with dietary recall* | 14%<br>0.79            | 15%<br>0.86             |
| <i>White bread</i><br>Percentage of gluten•<br>Correlation with dietary recall* | 12%<br>0.71            | 9%<br>0.45              |
| <i>Pizza</i><br>Percentage of gluten•<br>Correlation with dietary recall*       | 9%<br>Not measured     | 9%<br>0.42              |

NHS=Nurses' Health Study; HPFS=Health Professionals Follow-up Study

- Percentage of gluten was calculated as the proportion of total ingested gluten that was ingested in each food type.

\*Pearson correlation coefficients are reported.

<sup>a</sup> Salvini S, Hunter DJ, Sampson L, et al. Food-based validation of a dietary questionnaire: the effects of week-to-week variation in food consumption. *Int J Epidemiol.* 1989;18:858-67.

<sup>b</sup> Feskanich D, Rimm EB, Giovannucci EL, et al. Reproducibility and validity of food intake measurements from a semiquantitative food frequency questionnaire. *J Am Diet Assoc.* 1993;93:790-6.

**Supplementary Table B: Gluten and risk of fatal and non-fatal myocardial infarctions**

| Gluten Quintile                                               | 1 (lowest)      | 2                   | 3                   | 4                   | 5 (highest)         | p for trend |
|---------------------------------------------------------------|-----------------|---------------------|---------------------|---------------------|---------------------|-------------|
| NHS (mean, median, range)                                     | 2.6, 2.8, 0-3.4 | 3.8, 3.8, 3.4-4.3   | 4.7, 4.7 4.3-5.1    | 5.6, 5.6, 5.1-6.2   | 7.5, 7.1, 6.2-26.7  |             |
| HPFS (mean, median, range)                                    | 3.3, 3.5, 0-4.3 | 4.9, 4.9, 4.3-5.5   | 6.0, 6.0, 5.5-6.6   | 7.3, 7.3, 6.6-8.1   | 10.0, 9.4, 8.1-38.4 |             |
| <b>Fatal MI</b>                                               |                 |                     |                     |                     |                     |             |
| Number of events                                              | 612             | 433                 | 429                 | 392                 | 420                 |             |
| Person-years                                                  | 404450          | 453285              | 469817              | 477459              | 468920              |             |
| Incidence per 100,000 person-years                            | 151             | 96                  | 91                  | 82                  | 90                  |             |
| Multivariable-adjusted HR (95% CI) <sup>a</sup>               | 1.0 (reference) | 0.89 (0.79 to 1.01) | 0.93 (0.82 to 1.05) | 0.89 (0.78 to 1.01) | 0.93 (0.82 to 1.06) | 0.08        |
| <b>Non-Fatal MI</b>                                           |                 |                     |                     |                     |                     |             |
| Number of events                                              | 810             | 805                 | 914                 | 835                 | 879                 |             |
| Person-years                                                  | 404450          | 453285              | 469817              | 477459              | 468920              |             |
| Incidence per 100,000 person-years                            | 200             | 178                 | 195                 | 175                 | 187                 |             |
| Non-Fatal MI: Multivariable-adjusted HR (95% CI) <sup>a</sup> | 1.0 (reference) | 0.94 (0.85 to 1.04) | 1.04 (0.95 to 1.15) | 0.94 (0.86 to 1.04) | 1.01 (0.92 to 1.12) | 0.83        |

<sup>a</sup> Adjusted for age, race, BMI, height, history of diabetes, regular NSAID use, current use of multivitamin, alcohol intake (g/d), smoking (pack, years), aspirin use, statin use, parental history of myocardial infarction, history of hypertension, history of hypercholesterolemia, physical activity (MET, h/wk), menopausal status (NHS only) and menopausal hormone use (NHS only), trans fat, red meat, processed meat, polyunsaturated fats, fruits, and vegetables.

**Supplementary Table C: Gluten and risk of coronary heart disease events (fatal and non-fatal myocardial infarctions) by deciles of energy-adjusted gluten intake**

| Gluten Decile                                          | 1 (lowest)  | 2                   | 3                   | 4                   | 5                   | 6                   | 7                   | 8                   | 9                   | 10 (highest)        | p for trend |
|--------------------------------------------------------|-------------|---------------------|---------------------|---------------------|---------------------|---------------------|---------------------|---------------------|---------------------|---------------------|-------------|
| Median (range) gluten intake, women (g/d) <sup>a</sup> | 2.3 (0-2.8) | 3.1 (2.8-3.4)       | 3.6 (3.4-3.8)       | 4.1 (3.8-4.3)       | 4.5 (4.3-4.7)       | 4.9 (4.7-5.1)       | 5.3 (5.1-5.6)       | 5.8 (5.6-6.2)       | 6.5 (6.2-7.1)       | 8.0 (7.1-26.7)      |             |
| Median (range) gluten intake, men (g/d) <sup>a</sup>   | 2.8 (0-3.5) | 3.9 (3.5-4.3)       | 4.6 (4.3-4.9)       | 5.2 (4.9-5.5)       | 5.8 (5.5-6.0)       | 6.3 (6.0-6.6)       | 6.9 (6.6-7.3)       | 7.6 (7.3-8.1)       | 8.6 (8.1-9.4)       | 10.6 (9.4-38.4)     |             |
| Number of Events                                       | 716         | 706                 | 622                 | 616                 | 698                 | 645                 | 600                 | 627                 | 660                 | 639                 |             |
| Person-years                                           | 188727      | 215722              | 223746              | 229540              | 233180              | 236637              | 238032              | 239427              | 238120              | 230801              |             |
| Incidence per 100,000 person-years                     | 379         | 327                 | 278                 | 268                 | 299                 | 273                 | 252                 | 262                 | 277                 | 277                 |             |
| Multivariable-adjusted HR (95% CI) <sup>b</sup>        | 1 (ref)     | 0.96 (0.86 to 1.06) | 0.87 (0.78 to 0.97) | 0.86 (0.77 to 0.96) | 0.98 (0.88 to 1.09) | 0.90 (0.81 to 1.00) | 0.84 (0.75 to 0.94) | 0.89 (0.79 to 0.99) | 0.95 (0.85 to 1.06) | 0.91 (0.81 to 1.01) | 0.15        |

<sup>a</sup>Energy-adjusted, at baseline (1986)

<sup>b</sup> Adjusted for age, race, BMI, height, history of diabetes, regular NSAID use, current use of multivitamin, alcohol intake (g/d), smoking (pack, years), aspirin use, statin use, parental history of myocardial infarction, history of hypertension, history of hypercholesterolemia, physical activity (MET, h/wk), menopausal status (NHS only) and menopausal hormone use (NHS only), trans fat, red meat, processed meat, polyunsaturated fats, fruits, and vegetables.

**Supplementary Table D1: Gluten and risk of coronary heart disease (fatal and non-fatal myocardial infarctions), during the years 1986-1997**

|                                                 | Quintile of energy-adjusted gluten intake |                     |                     |                     |                     | p for trend |
|-------------------------------------------------|-------------------------------------------|---------------------|---------------------|---------------------|---------------------|-------------|
|                                                 | 1 (lowest)                                | 2                   | 3                   | 4                   | 5 (highest)         |             |
| <b>NHS</b>                                      |                                           |                     |                     |                     |                     |             |
| Daily gluten intake (g/d)                       |                                           |                     |                     |                     |                     |             |
| Mean, median                                    | 2.6, 2.8                                  | 3.8, 3.8            | 4.7, 4.7            | 5.6, 5.6            | 7.5, 7.1            |             |
| Range                                           | 0-3.4                                     | 3.4-4.3             | 4.3-5.1             | 5.1-6.2             | 6.2-26.7            |             |
| Number of Events                                | 246                                       | 206                 | 219                 | 219                 | 210                 |             |
| Person-years                                    | 255378                                    | 283760              | 291502              | 296797              | 293159              |             |
| Incidence per 100,000 person-years              | 96                                        | 73                  | 75                  | 74                  | 72                  |             |
| Age-adjusted HR (95% CI) <sup>a</sup>           | 1.0 (reference)                           | 0.82 (0.68 to 0.98) | 0.87 (0.72 to 1.04) | 0.86 (0.72 to 1.03) | 0.82 (0.68 to 0.98) | 0.09        |
| Multivariable-adjusted HR (95% CI) <sup>b</sup> | 1.0 (reference)                           | 0.91 (0.76 to 1.10) | 0.99 (0.83 to 1.19) | 1.00 (0.83 to 1.20) | 0.92 (0.76 to 1.10) | 0.58        |
| Full Model <sup>c</sup>                         | 1.0 (reference)                           | 0.90 (0.75 to 1.09) | 0.98 (0.82 to 1.18) | 0.99 (0.82 to 1.19) | 0.91 (0.75 to 1.10) | 0.54        |
| <b>HPFS</b>                                     |                                           |                     |                     |                     |                     |             |
| Daily gluten intake (g/d)                       |                                           |                     |                     |                     |                     |             |
| Mean, median                                    | 3.3, 3.5                                  | 4.9, 4.9            | 6.0, 6.0            | 7.3, 7.3            | 10.0, 9.4           |             |
| Range                                           | 0-4.3                                     | 4.3-5.5             | 5.5-6.6             | 6.6-8.1             | 8.1-38.4            |             |
| Number of Events                                | 441                                       | 373                 | 402                 | 352                 | 354                 |             |
| Person-years                                    | 165937                                    | 178215              | 184177              | 185195              | 181380              |             |
| Incidence per 100,000 person-years              | 266                                       | 209                 | 218                 | 190                 | 195                 |             |
| Age-adjusted HR (95% CI) <sup>a</sup>           | 1.0 (reference)                           | 0.88 (0.77 to 1.01) | 0.97 (0.84 to 1.11) | 0.85 (0.74 to 0.98) | 0.88 (0.77 to 1.02) | 0.08        |
| Multivariable-adjusted HR (95% CI) <sup>b</sup> | 1.0 (reference)                           | 0.92 (0.80 to 1.05) | 1.03 (0.90 to 1.18) | 0.92 (0.80 to 1.06) | 0.94 (0.82 to 1.08) | 0.41        |
| Full Model <sup>c</sup>                         | 1.0 (reference)                           | 0.91 (0.79 to 1.04) | 1.02 (0.89 to 1.17) | 0.91 (0.79 to 1.04) | 0.92 (0.80 to 1.07) | 0.27        |
| <b>Pooled</b>                                   |                                           |                     |                     |                     |                     |             |
| Number of Events                                | 687                                       | 579                 | 621                 | 571                 | 564                 |             |
| Person-years                                    | 421315                                    | 461975              | 475679              | 481992              | 474538              |             |
| Incidence per 100,000 person-years              | 163                                       | 125                 | 131                 | 118                 | 119                 |             |
| Age-adjusted HR (95% CI)                        | 1.0 (reference)                           | 0.85 (0.76 to 0.95) | 0.92 (0.83 to 1.03) | 0.85 (0.76 to 0.95) | 0.84 (0.75 to 0.94) | 0.0076      |

|                                                 |                 |                     |                     |                     |                     |      |
|-------------------------------------------------|-----------------|---------------------|---------------------|---------------------|---------------------|------|
| Multivariable-adjusted HR (95% CI) <sup>b</sup> | 1.0 (reference) | 0.91 (0.82 to 1.02) | 1.01 (0.90 to 1.12) | 0.94 (0.84 to 1.05) | 0.92 (0.82 to 1.03) | 0.20 |
| Full Model HR (95% CI) <sup>c</sup>             | 1.0 (reference) | 0.90 (0.80 to 1.00) | 0.98 (0.88 to 1.10) | 0.91 (0.81 to 1.01) | 0.89 (0.79 to 0.99) | 0.05 |

NHS=Nurses' Health Study; HPFS=Health Professionals Follow-up Study

a: Age-adjusted only

b: Above model additionally adjusted for race, BMI, height, history of diabetes, regular NSAID use, current use of multivitamin, alcohol intake (g/d), smoking (pack, years), aspirin use, statin use, parental history of myocardial infarction, history of hypertension, history of hypercholesterolemia, physical activity (MET, h/wk), menopausal status (NHS only) and menopausal hormone use (NHS only).

c: Above model additionally adjusted trans fat, red meat, processed meat, polyunsaturated fats, fruits, and vegetables.

**Supplementary Table D2: Gluten and risk of coronary heart disease (fatal and non-fatal myocardial infarctions), during the years 1998-2012**

|                                                 | Quintile of energy-adjusted gluten intake |                     |                     |                     |                     | p for trend |
|-------------------------------------------------|-------------------------------------------|---------------------|---------------------|---------------------|---------------------|-------------|
|                                                 | 1 (lowest)                                | 2                   | 3                   | 4                   | 5 (highest)         |             |
| <b>NHS</b>                                      |                                           |                     |                     |                     |                     |             |
| Daily gluten intake (g/d)                       |                                           |                     |                     |                     |                     |             |
| Mean, median                                    | 2.6, 2.8                                  | 3.8, 3.8            | 4.7, 4.7            | 5.6, 5.6            | 7.5, 7.1            |             |
| Range                                           | 0-3.4                                     | 3.4-4.3             | 4.3-5.1             | 5.1-6.2             | 6.2-26.7            |             |
| Number of Events                                | 246                                       | 264                 | 275                 | 252                 | 294                 |             |
| Person-years                                    | 106777                                    | 129998              | 137173              | 141358              | 139346              |             |
| Incidence per 100,000 person-years              | 230                                       | 203                 | 200                 | 178                 | 211                 |             |
| Age-adjusted HR (95% CI) <sup>a</sup>           | 1.0 (reference)                           | 0.94 (0.79 to 1.11) | 0.94 (0.79 to 1.12) | 0.83 (0.70 to 0.99) | 0.96 (0.81 to 1.14) | 0.44        |
| Multivariable-adjusted HR (95% CI) <sup>b</sup> | 1.0 (reference)                           | 1.03 (0.86 to 1.22) | 1.05 (0.88 to 1.25) | 0.94 (0.78 to 1.12) | 1.07 (0.90 to 1.27) | 0.71        |
| Full Model <sup>c</sup>                         | 1.0 (reference)                           | 1.02 (0.86 to 1.22) | 1.06 (0.89 to 1.26) | 0.94 (0.79 to 1.13) | 1.09 (0.91 to 1.30) | 0.54        |
| <b>HPFS</b>                                     |                                           |                     |                     |                     |                     |             |
| Daily gluten intake (g/d)                       |                                           |                     |                     |                     |                     |             |
| Mean, median                                    | 3.3, 3.5                                  | 4.9, 4.9            | 6.0, 6.0            | 7.3, 7.3            | 10.0, 9.4           |             |
| Range                                           | 0-4.3                                     | 4.3-5.5             | 5.5-6.6             | 6.6-8.1             | 8.1-38.4            |             |
| Number of Events                                | 489                                       | 395                 | 447                 | 404                 | 441                 |             |
| Person-years                                    | 62823                                     | 74218               | 79556               | 80480               | 77654               |             |
| Incidence per 100,000 person-years              | 778                                       | 532                 | 562                 | 502                 | 568                 |             |
| Age-adjusted HR (95% CI) <sup>a</sup>           | 1.0 (reference)                           | 0.75 (0.66 to 0.86) | 0.83 (0.73 to 0.94) | 0.76 (0.67 to 0.87) | 0.88 (0.77 to 1.00) | 0.13        |
| Multivariable-adjusted HR (95% CI) <sup>b</sup> | 1.0 (reference)                           | 0.81 (0.71 to 0.93) | 0.91 (0.80 to 1.04) | 0.85 (0.75 to 0.98) | 1.00 (0.87 to 1.14) | 0.74        |
| Full Model <sup>c</sup>                         | 1.0 (reference)                           | 0.81 (0.71 to 0.92) | 0.90 (0.79 to 1.02) | 0.84 (0.73 to 0.96) | 0.97 (0.85 to 1.11) | 0.96        |
| <b>Pooled</b>                                   |                                           |                     |                     |                     |                     |             |
| Number of Events                                | 735                                       | 659                 | 722                 | 656                 | 735                 |             |
| Person-years                                    | 169601                                    | 204216              | 216729              | 221838              | 217000              |             |
| Incidence per 100,000 person-years              | 433                                       | 323                 | 333                 | 296                 | 339                 |             |
| Age-adjusted HR (95% CI)                        | 1.0 (reference)                           | 0.81 (0.73 to 0.90) | 0.86 (0.78 to 0.96) | 0.77 (0.69 to 0.86) | 0.88 (0.80 to 0.98) | 0.06        |
| Multivariable-adjusted HR (95% CI) <sup>b</sup> | 1.0 (reference)                           | 0.88 (0.79 to 0.98) | 0.96 (0.86 to 1.06) | 0.88 (0.79 to 0.98) | 1.02 (0.92 to 1.13) | 0.46        |

|                                     |                 |                     |                     |                     |                     |      |
|-------------------------------------|-----------------|---------------------|---------------------|---------------------|---------------------|------|
| Full Model HR (95% CI) <sup>c</sup> | 1.0 (reference) | 0.87 (0.78 to 0.97) | 0.94 (0.85 to 1.04) | 0.86 (0.77 to 0.96) | 0.99 (0.89 to 1.10) | 0.84 |
|-------------------------------------|-----------------|---------------------|---------------------|---------------------|---------------------|------|

NHS=Nurses' Health Study; HPFS=Health Professionals Follow-up Study

a: Age-adjusted only

b: Above model additionally adjusted for race, BMI, height, history of diabetes, regular NSAID use, current use of multivitamin, alcohol intake (g/d), smoking (pack, years), aspirin use, statin use, parental history of myocardial infarction, history of hypertension, history of hypercholesterolemia, physical activity (MET, h/wk), menopausal status (NHS only) and menopausal hormone use (NHS only).

c: Above model additionally adjusted trans fat, red meat, processed meat, polyunsaturated fats, fruits, and vegetables.

**Supplementary Table E: Gluten and risk of coronary heart disease (fatal and non-fatal myocardial infarctions), now not suspending dietary data after a diagnosis of diabetes, cardiovascular disease or cancer.**

|                                                 | Quintile of energy-adjusted gluten intake |                     |                     |                     |                     | p for trend |
|-------------------------------------------------|-------------------------------------------|---------------------|---------------------|---------------------|---------------------|-------------|
|                                                 | 1 (lowest)                                | 2                   | 3                   | 4                   | 5 (highest)         |             |
| <b>NHS</b>                                      |                                           |                     |                     |                     |                     |             |
| Daily gluten intake (g/d)                       |                                           |                     |                     |                     |                     |             |
| Mean, median                                    | 2.6, 2.8                                  | 3.8, 3.8            | 4.7, 4.7            | 5.6, 5.6            | 7.5, 7.1            |             |
| Range                                           | 0-3.4                                     | 3.4-4.3             | 4.3-5.1             | 5.1-6.2             | 6.2-26.7            |             |
| Number of events                                | 475                                       | 489                 | 488                 | 463                 | 516                 |             |
| Person-years                                    | 265305                                    | 280725              | 285856              | 287862              | 287780              |             |
| Incidence per 100,000 person-years              | 179                                       | 174                 | 171                 | 161                 | 179                 |             |
| Age-adjusted HR (95% CI) <sup>a</sup>           | 1.0 (reference)                           | 1.01 (0.89 to 1.15) | 0.99 (0.88 to 1.13) | 0.94 (0.82 to 1.06) | 1.02 (0.90 to 1.16) | 0.85        |
| Multivariable-adjusted HR (95% CI) <sup>b</sup> | 1.0 (reference)                           | 1.03 (0.90 to 1.17) | 1.01 (0.89 to 1.14) | 0.94 (0.82 to 1.07) | 1.01 (0.89 to 1.15) | 0.69        |
| Full Model <sup>c</sup>                         | 1.0 (reference)                           | 1.02 (0.90 to 1.16) | 1.01 (0.89 to 1.14) | 0.94 (0.82 to 1.07) | 1.03 (0.90 to 1.17) | 0.91        |
| <b>HPFS</b>                                     |                                           |                     |                     |                     |                     |             |
| Daily gluten intake (g/d)                       |                                           |                     |                     |                     |                     |             |
| Mean, median                                    | 3.3, 3.5                                  | 4.9, 4.9            | 6.0, 6.0            | 7.3, 7.3            | 10.0, 9.4           |             |
| Range                                           | 0-4.3                                     | 4.3-5.5             | 5.5-6.6             | 6.6-8.1             | 8.1-38.4            |             |
| Number of events                                | 863                                       | 827                 | 851                 | 770                 | 787                 |             |
| Person-years                                    | 163420                                    | 173056              | 176357              | 177322              | 176235              |             |
| Incidence per 100,000 person-years              | 528                                       | 478                 | 483                 | 434                 | 447                 |             |
| Age-adjusted HR (95% CI) <sup>a</sup>           | 1.0 (reference)                           | 0.94 (0.86 to 1.04) | 0.98 (0.89 to 1.08) | 0.90 (0.82 to 0.99) | 0.95 (0.86 to 1.05) | 0.18        |
| Multivariable-adjusted HR (95% CI) <sup>b</sup> | 1.0 (reference)                           | 0.97 (0.88 to 1.07) | 1.03 (0.94 to 1.14) | 0.96 (0.87 to 1.06) | 1.02 (0.93 to 1.13) | 0.85        |
| Full Model <sup>c</sup>                         | 1.0 (reference)                           | 0.96 (0.88 to 1.06) | 1.02 (0.93 to 1.12) | 0.94 (0.85 to 1.04) | 1.00 (0.91 to 1.10) | 0.79        |
| <b>Pooled</b>                                   |                                           |                     |                     |                     |                     |             |
| Number of events                                | 1338                                      | 1316                | 1339                | 1233                | 1303                |             |
| Person-years                                    | 428725                                    | 453781              | 462213              | 465184              | 464015              |             |
| Incidence per 100,000 person-years              | 312                                       | 290                 | 290                 | 265                 | 281                 |             |
| Age-adjusted HR (95% CI)                        | 1.0 (reference)                           | 0.97 (0.90 to 1.05) | 0.99 (0.92 to 1.07) | 0.91 (0.84 to 0.99) | 0.96 (0.89 to 1.04) | 0.16        |

|                                                 |                 |                     |                     |                     |                     |      |
|-------------------------------------------------|-----------------|---------------------|---------------------|---------------------|---------------------|------|
| Multivariable-adjusted HR (95% CI) <sup>b</sup> | 1.0 (reference) | 1.00 (0.92 to 1.08) | 1.03 (0.95 to 1.11) | 0.95 (0.88 to 1.03) | 1.02 (0.95 to 1.10) | 0.99 |
| Full Model HR (95% CI) <sup>c</sup>             | 1.0 (reference) | 0.98 (0.91 to 1.06) | 1.00 (0.93 to 1.08) | 0.93 (0.86 to 1.00) | 0.99 (0.92 to 1.07) | 0.44 |

NHS=Nurses' Health Study; HPFS=Health Professionals Follow-up Study

a: Age-adjusted only

b: Above model additionally adjusted for race, BMI, height, history of diabetes, regular NSAID use, current use of multivitamin, alcohol intake (g/d), smoking (pack, years), aspirin use, statin use, parental history of myocardial infarction, history of hypertension, history of hypercholesterolemia, physical activity (MET, h/wk), menopausal status (NHS only) and menopausal hormone use (NHS only).

c: Above model additionally adjusted trans fat, red meat, processed meat, polyunsaturated fats, fruits, and vegetables.
